# Supplementary figures and images for: Zirconia-Toughened Alumina Ceramic Wear Particles Do Not Elicit Inflammatory Responses in Human Macrophages
Source: MDPI journal article supplement (doi:10.3390/ijms24076482), 2023-03-30

Supplementary Figure S1. SEM pictures of ZTA and CoCr particles.

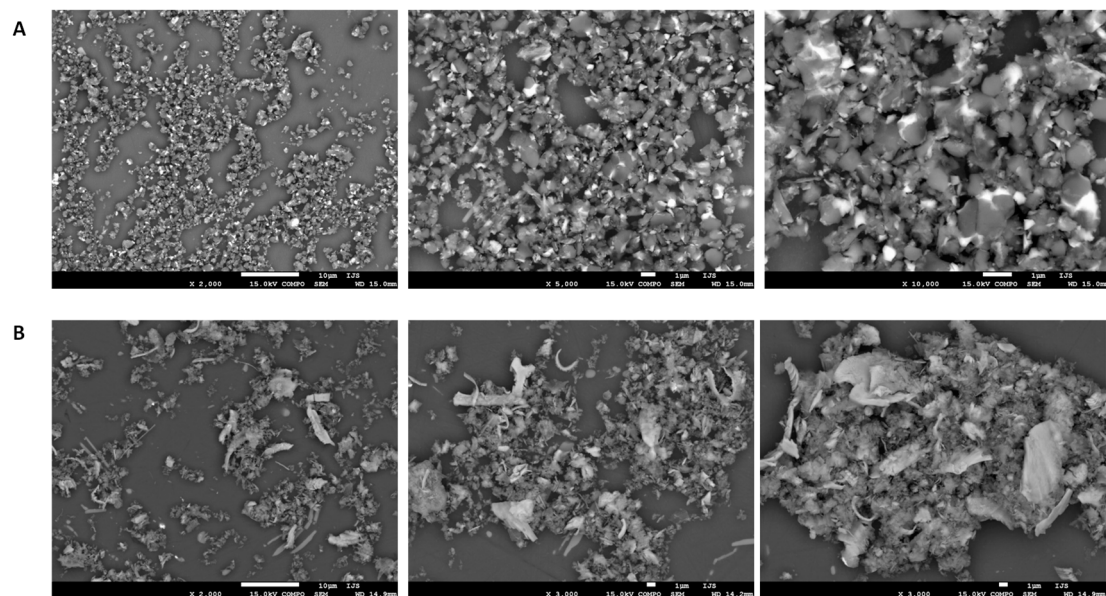

Supplement: s1 [file s1]
